# Supplementary material for: Lola regulates Drosophila olfactory projection neuron identity and targeting specificity
Source: PubMed Central journal article supplement (PMC1947980; doi:10.1186/1749-8104-2-14), 2007-07-16

# Figure S4

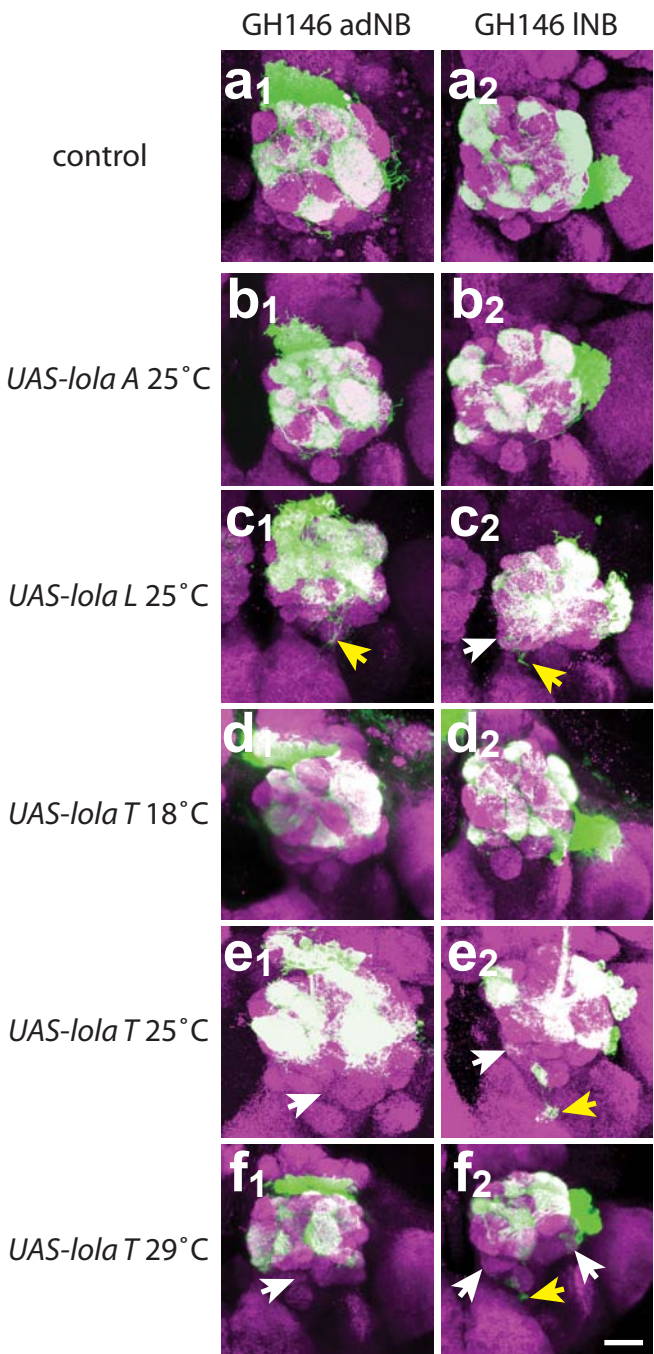

Supplement: 1749-8104-2-14-S5.pdf [file 1749-8104-2-14-S5.pdf]
