# Supplementary material for: Lola regulates Drosophila olfactory projection neuron identity and targeting specificity
Source: PubMed Central journal article supplement (PMC1947980; doi:10.1186/1749-8104-2-14), 2007-07-16

# Figure S5

GH146 adNB

GH146 INB

control

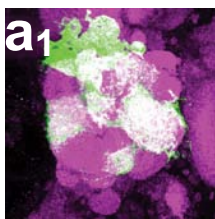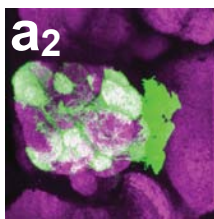

*lola*<sup>-/-</sup>

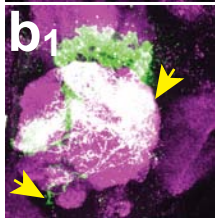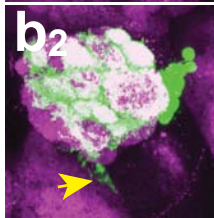

*lola*<sup>-/-</sup>, UAS-*lola A*

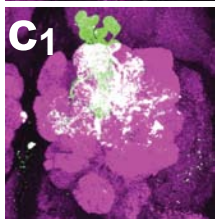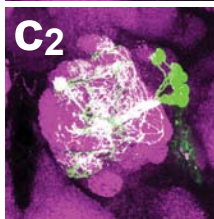

*lola*<sup>-/-</sup>, UAS-*lola L*

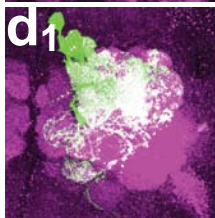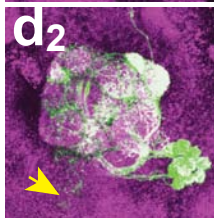

*lola*<sup>-/-</sup>, UAS-*lola T*

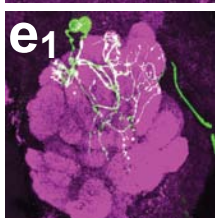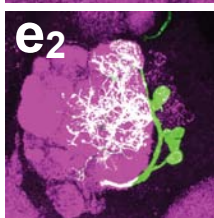

Supplement: 1749-8104-2-14-S6.pdf [file 1749-8104-2-14-S6.pdf]
